# Supplementary material
Source: publisher figshare collection journal article supplement (https://gsajournals.figshare.com/ndownloader/files/13515320)
Supplement: Supplementary file 1 [file 13515320]

## Sheet: Sheet1
Table S5. Primer sequences
ID	Primer Name	Sequence	Locus
1	STT5’	TGTACAAAAAAGCAGGCTTTAAAG	5’ of SidT1 and SidT2 sgRNA gBlocks
2	STT3’	TAATGCCAACTTTGTACAAGAAAG	3’ of SidT1 and SidT2 sgRNA gBlocks
3	Primer-Geno1 (P1)	AATAGACTGTGTTCTATCTCATGTGC	149 bp upstream of the SidT1 stop codon
4	Primer-Geno2 (P2)	TGTGAATTCAGACACCCTTG	140 bp downstream of the SidT1 stop codon
5	Primer-Seq3 (P3)	TCTCATGTGCCTTCTTCCTG	133 bp upstream of the SidT1 stop codon
6	Primer-Geno4 (P4)	GGATGTGCCTGGCCTGAG	142 bp upstream of the SidT2 stop codon
7	Primer-Geno5 (P5)	CAGAGGGGATGGTAGAGCAG	146 bp downstream of the SidT2 stop codon
8	Primer-Seq6 (P6)	CAGAGGGGATGGTAGAGCAG	123 bp upstream of the SidT2 stop codon
9	Primer- Seq7 (P7)	TCCTCGACTTCTTTGATGACC	220 bp upstream of the SidT2 stop codon
10	Primer-Seq8 (P8)	GCTGGAATCTCGCTGTCTT	146 bp downstream of the SidT2 stop codon
11	Surveyor SidT1 5'	CCTGAGCTCCCAACCTTCAC	183 bp upstream of the SidT1 stop codon
12	Surveyor SidT1 3'	CAGCAGGTGTCTCAGAGGTG	392 bp downstream of the SidT1 stop codon
13	Surveyor SidT2 5'	TGCTCTCCTGTTAGGGACCA	372 bp upstream of the SidT2 stop codon
14	Surveyor SidT2 3'	GGCTGGAATCTCGCTGTCTT	147 bp downstream of the SidT2 stop codon
15	T7 Promoter sgRNA1	TtaatacgactcactataggGTCTCTCCGGACCACATCC	5’ of sgRNA1
16	T7 Promoter sgRNA2	TtaatacgactcactataggGAGCACCCAGCATCACAGG	5’ of sgRNA2
17	T7 Promoter sgRNA3	TtaatacgactcactataggGTCAGCAAAACCTAAGGGT	5’ of sgRNA3
18	T7 Promoter sgRNA4	TtaatacgactcactataggGACTTGGACACAGTACAGC	5’ of sgRNA4
19	T7 Terminator sgRNA, all	AAAAGCACCGACTCGGTGCC	3’ of sgRNA scaffold
20	5’ Long ssDNA1	GTTTAAGATCCTTTCACGGATGTT	5’ of long ssDNA1 gBlock
21	5’ Long ssDNA2	GGTATGTGGGATGTGCCTG	5’ of long ssDNA2 gBlock
22	T7 Promoter 3’ Long ssDNA1	TtaatacgactcactataggGTGGAGCGTCTGGCAGTG	3’ of long ssDNA1 gBlock
23	T7 Promoter 3’ Long ssDNA2	TtaatacgactcactataggGTGTTCTTGTGGCAACTGGC	3’ of long ssDNA2 gBlock
24	3’ Long ssDNA1	GTGGAGCGTCTGGCAGTG	3’ of long ssDNA1 gBlock
25	3’ Long ssDNA2	GTGTTCTTGTGGCAACTGGC	3’ of long ssDNA2 gBlock
